# Supplementary material for: Surface Ig variable domain glycosylation affects autoantigen binding and acts as threshold for human autoreactive B cell activation
Source: PubMed Central journal article supplement — Sci Adv. 2022 Feb 9;8(6):eabm1759. doi: 10.1126/sciadv.abm1759 (PMC8827743; doi:10.1126/sciadv.abm1759), 2022-02-09
Supplement: sciadv.abm1759_sm.pdf [file sciadv.abm1759_sm.pdf]

Supplementary Materials for

**Surface Ig variable domain glycosylation affects autoantigen binding and acts as threshold for human autoreactive B cell activation**

Theresa Kissel\*, Changrong Ge, Lise Hafkenschied, Joanneke C. Kwekkeboom, Linda M. Slot, Marco Cavallari, Yibo He, Karin A. van Schie, Rochelle D. Vergroesen, Arieke S.B. Kampstra, Sanne Reijm, Gerrie Stoeken-Rijsbergen, Carolien Koeleman, Lennard M. Voortman, Laura H. Heitman, Bingze Xu, Ger J.M. Pruijn, Manfred Wuhrer, Theo Rispens, Tom W.J. Huizinga, Hans Ulrich Scherer, Michael Reth, Rikard Holmdahl\*, Rene E.M. Toes\*

\*Corresponding author. Email: t.kissel@lumc.nl (T.K.); rikard.holmdahl@ki.se (R.H.); r.e.m.toes@lumc.nl (R.E.M.T.)

Published 9 February 2022, *Sci. Adv.* **8**, eabm1759 (2022)  
DOI: 10.1126/sciadv.abm1759

**This PDF file includes:**

Figs. S1 to S8  
Tables S1 to S6

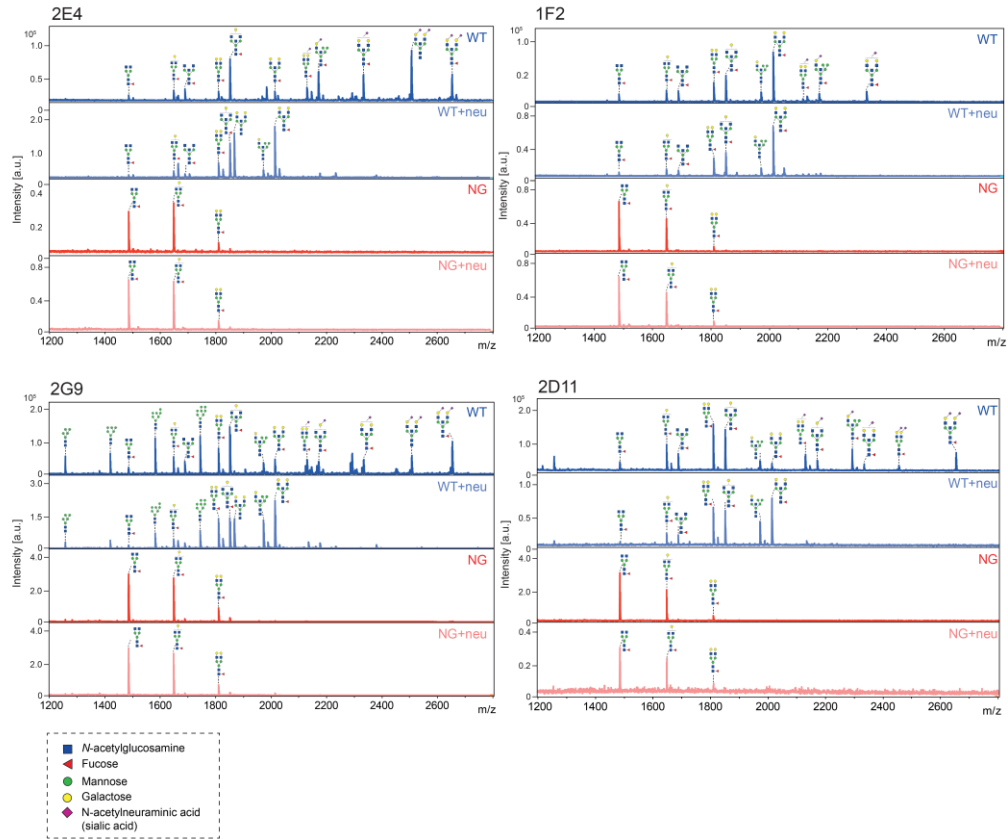

**Fig. S1. MALDI-TOF analysis of released and stabilized *N*-linked variable domain and Fc-glycans from WT (blue), WT+neu (light blue), NG (red) and NG+neu (light red) ACPA-IgG 2E4, 1F2, 2G9 and 2D11.** Glycan structures of the most abundant *N*-linked glycan peaks are depicted. Blue square: *N*-acetylglucosamine (GlcNAc), green circle: mannose, yellow circle: galactose, red triangle: fucose, purple diamond:  $\alpha$ 2,6-linked *N*-acetylneuraminic acid.

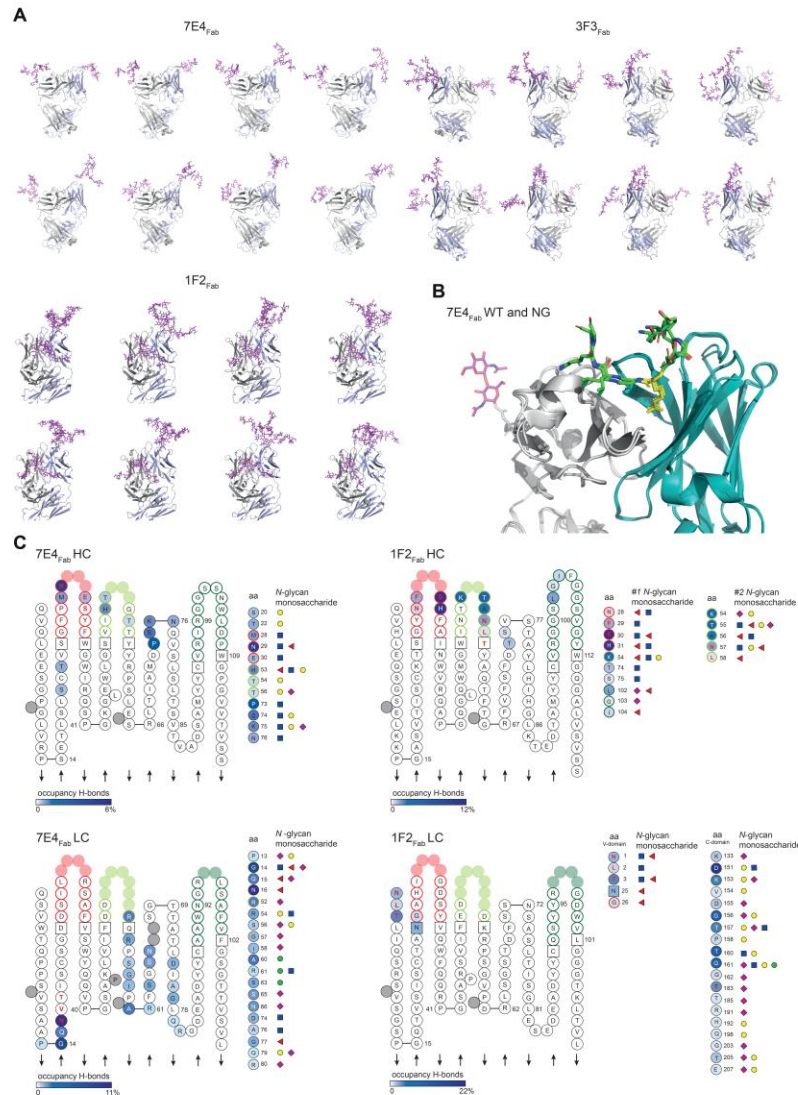

**Fig. S2. Molecular dynamics (MD)-simulations to predict VDG-antibody interactions and 7E4<sub>Fab</sub> crystal structure comparison with and without N-linked glycan sites.** (A) MD-simulations, 8 time-points, of 7E4<sub>Fab</sub>, 3F3<sub>Fab</sub> and 1F2<sub>Fab</sub> crystal structures modelled with full length disialylated VDG (sticks in magenta). (B) Superposition of 7E4<sub>Fab</sub> crystal structures expressed with and without N-linked glycan sites. 7E4<sub>Fab</sub> WT including N-linked glycan sites was crystallized together with the first two GlcNAcs (sticks in magenta) of the LC VDG. LC is depicted in light grey, HC in steel blue, the peptides bound to the respective Fab as sticks with carbon (green), oxygen (red) and nitrogen (blue) atoms. (C) ACPA 7E4<sub>Fab</sub> and 1F2<sub>Fab</sub> HC and LC variable gene aa-sequences, based on IMGT (2D), are depicted. Acceptor/ donor pairs of H-bond interactions between the antibody and HC (#1 and #2)/LC N-glycans are visualized. A high occupancy is depicted in dark blue (HC: 6%; 12%, LC: 11%; 22%) and a low occupancy is depicted in light blue (0.01-0.2%). Amino acids and their respective interaction partners (N-glycan monosaccharides) are shown. Blue square: N-acetylglucosamine, green circle: mannose, yellow circle: galactose, red triangle: fucose, purple diamond:  $\alpha$  2,6-linked N-acetylneuraminic acid (sialic acid).

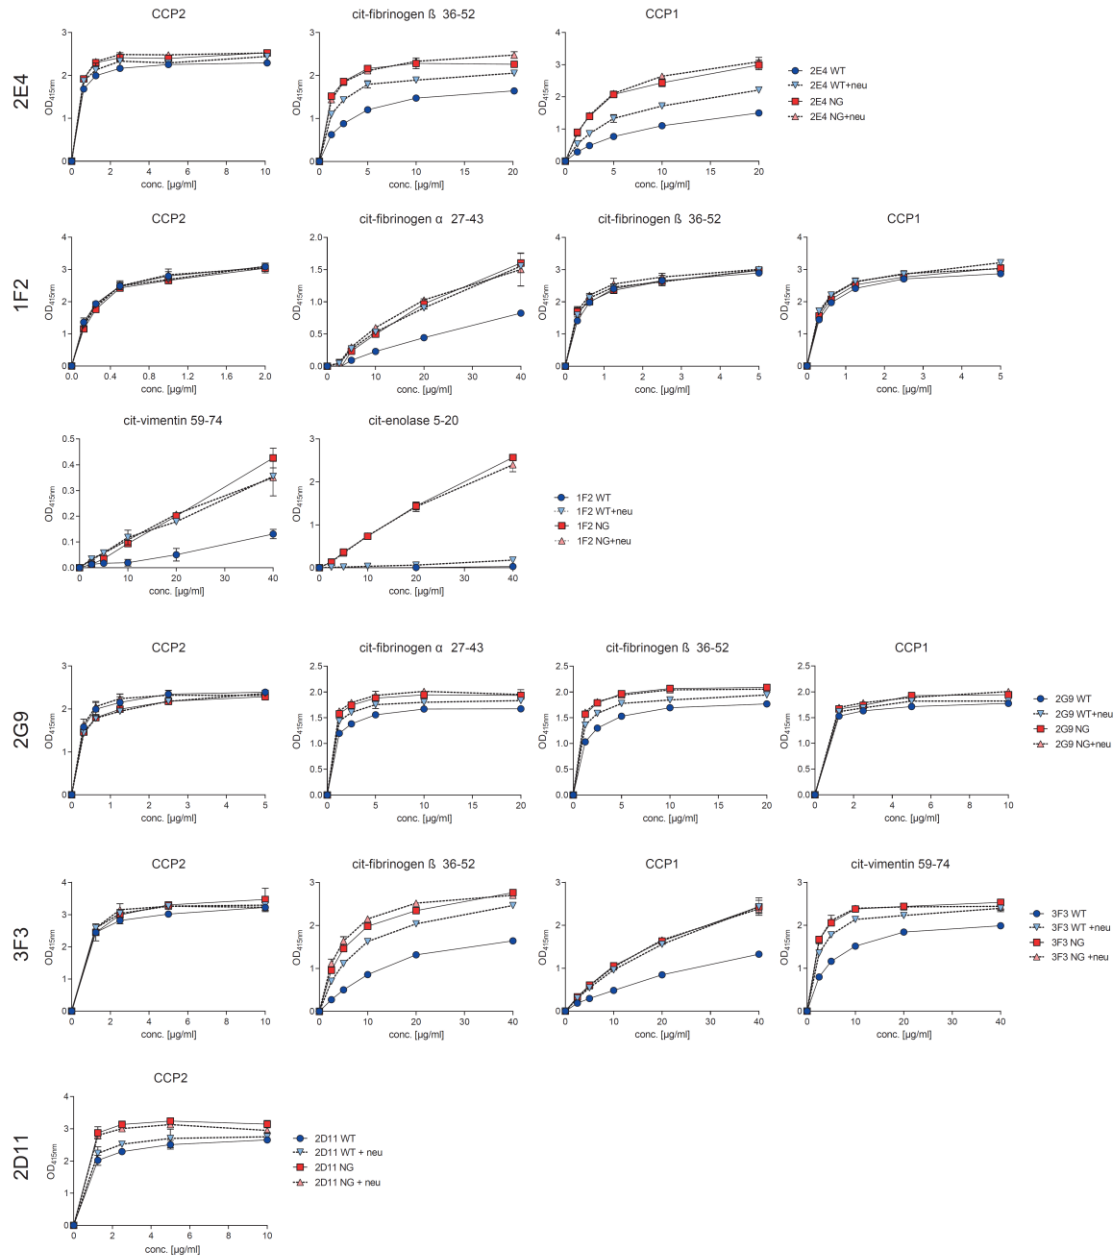

**Fig. S3. Impact of disialylated ACPA VDG on citrullinated peptide binding.** ELISA titration binding curves of the ACPA 2E4, 1F2, 2D11, 2G9 and 3F3 (0-40µg/ml) variants (WT, WT+neu, NG and NG+neu) towards citrullinated peptides (CCP2, CCP1, cit-fibrinogen  $\alpha$  27-43, cit-fibrinogen  $\beta$  36-52, cit-vimentin 59-74, cit-enolase 5-20). Binding to the arginine control peptide was subtracted. Reactivity was determined via the OD at 415nm. Each data point represents the mean of two technical replicates. N= 2-3.

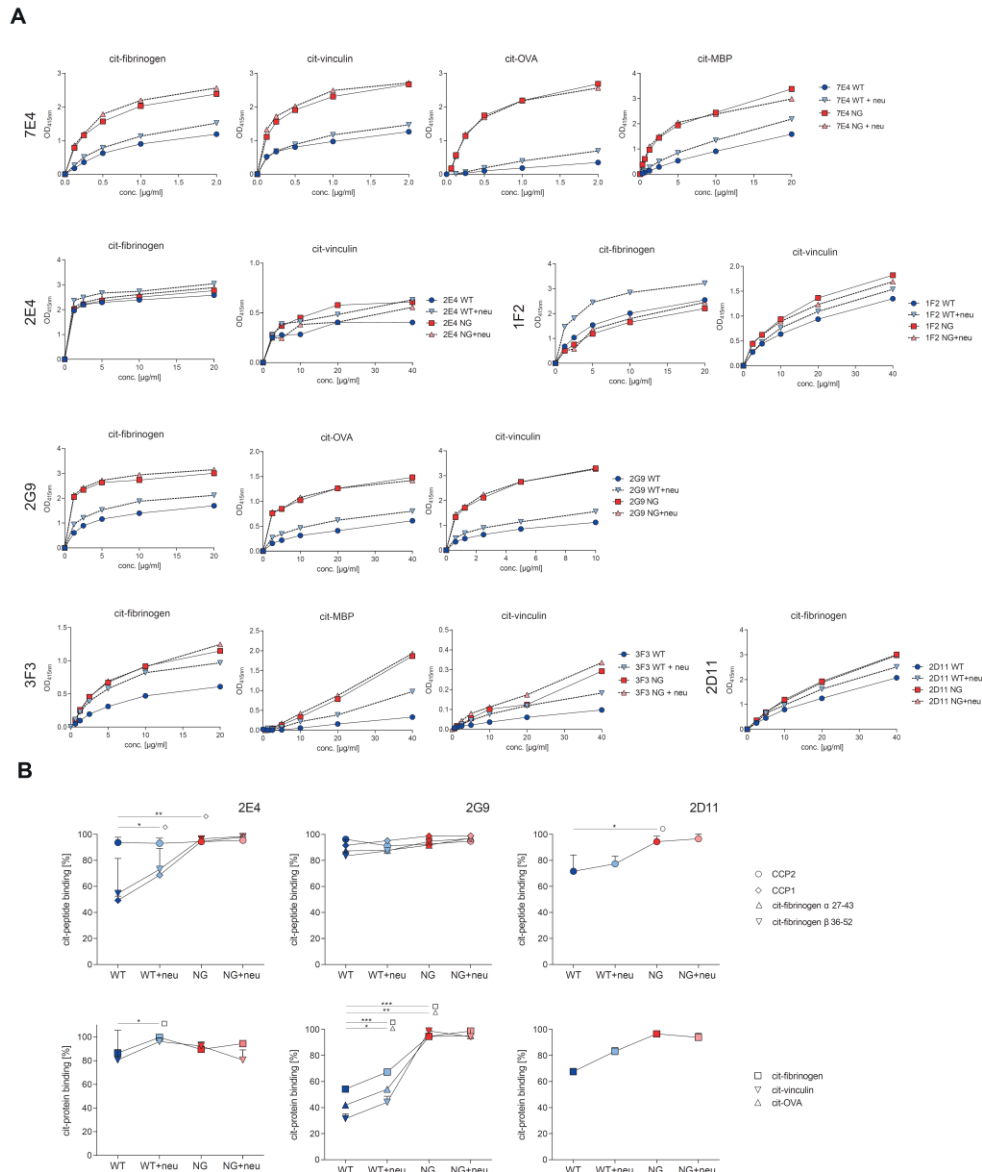

**Fig. S4. Impact of disialylated ACPA VDG on citrullinated protein binding.** (A) ELISA titration binding curves of the ACPA 2E4, 1F2, 2D11, 2G9 and 3F3 (0-40 $\mu$ g/ml) variants (WT, WT+neu, NG and NG+neu) towards citrullinated proteins (cit-fibrinogen, cit-vinculin, cit-MBP and cit-OVA). Binding to the arginine control protein was subtracted. Reactivity was determined via the OD at 415nm. N= 2-3. (B) Relative binding of the ACPA mAb 2E4, 2G9 and 2D11 (10-40 $\mu$ g/ml) variants (WT, WT+neu, NG, NG+neu) towards citrullinated peptides and proteins. N=2-3. Unpaired two-tailed t-tests assuming the same SD. 2E4WT-NG: \*\*p(CCP1)=0.0028; 2E4WT-WT+neu: \*p(CCP1)=0.0143, \*p(cit-fibrinogen)=0.0226; 2G9WT-NG: \*\*\*p(cit-fibrinogen)=0.0009, \*\*p(cit-OVA)=0.0047; 2G9WT-WT+neu: \*\*\*p(cit-fibrinogen)=0.0004, \*p(cit-OVA)=0.0297; 2D11WT-NG: \*p(CCP2)=0.0406.

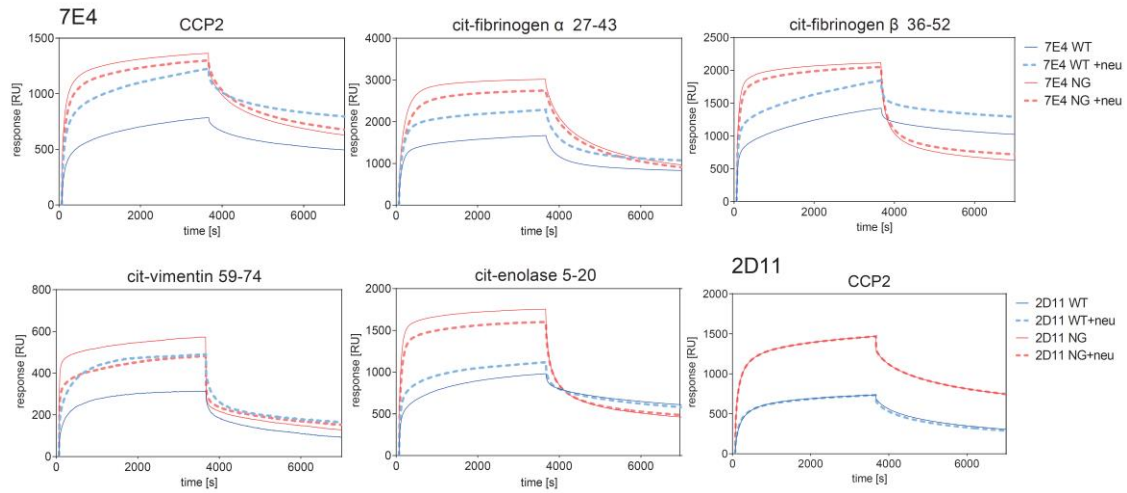

**Fig. S5. SPR sensorgrams of ACPA-IgG 7E4 and 2D11 binding to citrullinated peptides.** Antigen association and dissociation are represented as response units (RU) over time (s). The experiment represents 2 technical replicates. Four different monoclonal antibody variants were assessed: WT, WT+neu, NG and NG+neu.

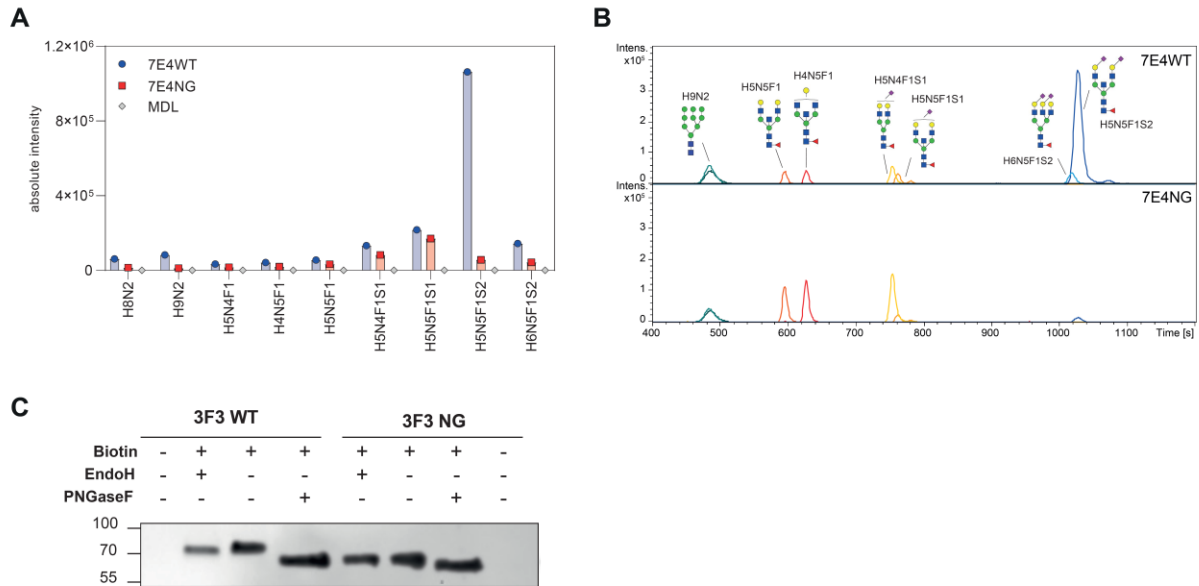

**Fig. S6. Human Ramos IgG B cell receptor glycan analysis.** (A) Absolute intensity of glycan traits expressed on the 7E4 WT, NG and MDL IgG BCR after passing QC settings. (B) LC-chromatogram of glycan traits expressed on the 7E4 WT and NG (IgG BCR after passing QC settings). The respective glycan traits are schematically illustrated. (C) Western blot analyses of PBS-treated (- Biotin) or biotinylated (+ Biotin) surface IgG 3F3 WT and NG BCRs after NeutrAvidin capturing. Biotinylated mIgG with and without VDG were treated with 2U EndoH (cleavage of high-mannose structures) or 2U PNGaseF (cleavage of all *N*-glycans).

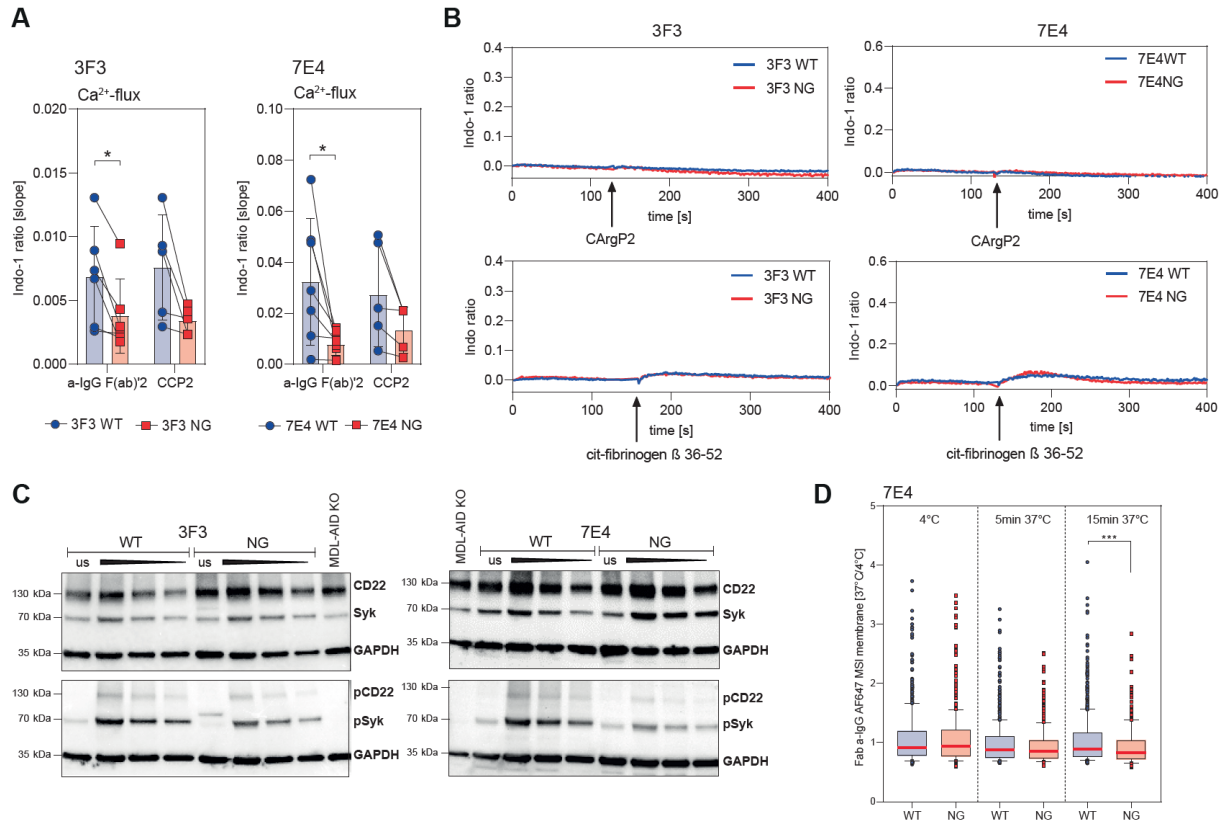

**Fig. S7. Impact of mIgG VDG on human Ramos B cell activation and BCR downmodulation.** (A) Paired analysis of Ca<sup>2+</sup>-flux speed (slope) for mIgG 3F3/ 7E4 WT and NG Ramos B cells after a-IgG F(ab)<sub>2</sub> and antigen (CCP2-SA) stimulation. Paired two-tailed t-test. N=5-7. 3F3: \*p=0.0377; 7E4: \*p=0.0206. (B) Overlays of WT and NG Ca<sup>2+</sup>-flux (Ca<sup>2+</sup> bound Indo-1/ unbound Indo-1) of mIgG 3F3/ 7E4 WT and NG Ramos B cells after stimulation with CArgP2-SA or cit-fibrinogen β 36-52. (C) Western blot analyses of mIgG 3F3/ 7E4 WT and NG Ramos B cells after 5 minutes of CCP2 stimulation or unstimulated (us). CD22, Syk, pCD22 (Y822) and pSyk(Y352) expression are shown. Cell lysis of 1 million (unstimulated and stimulated 1<sup>st</sup> slot), 0.5 million (stimulated 2<sup>nd</sup> slot) and 0.25 million (stimulated 3<sup>rd</sup> slot) were blotted. GAPDH was used as loading control. Cell lysates of 1 million MDL-AID KO cells were added as additional control. (D) Remaining mIgG 7E4 WT and NG expression after CCP2-SA stimulation and incubation at 4°C or 5, 15 minutes at 37°C. N = 619, 459, 645, 433, 738 and 302 cell slices respectively. Ordinary one-way ANOVA, \*\*\*p=0.0002.



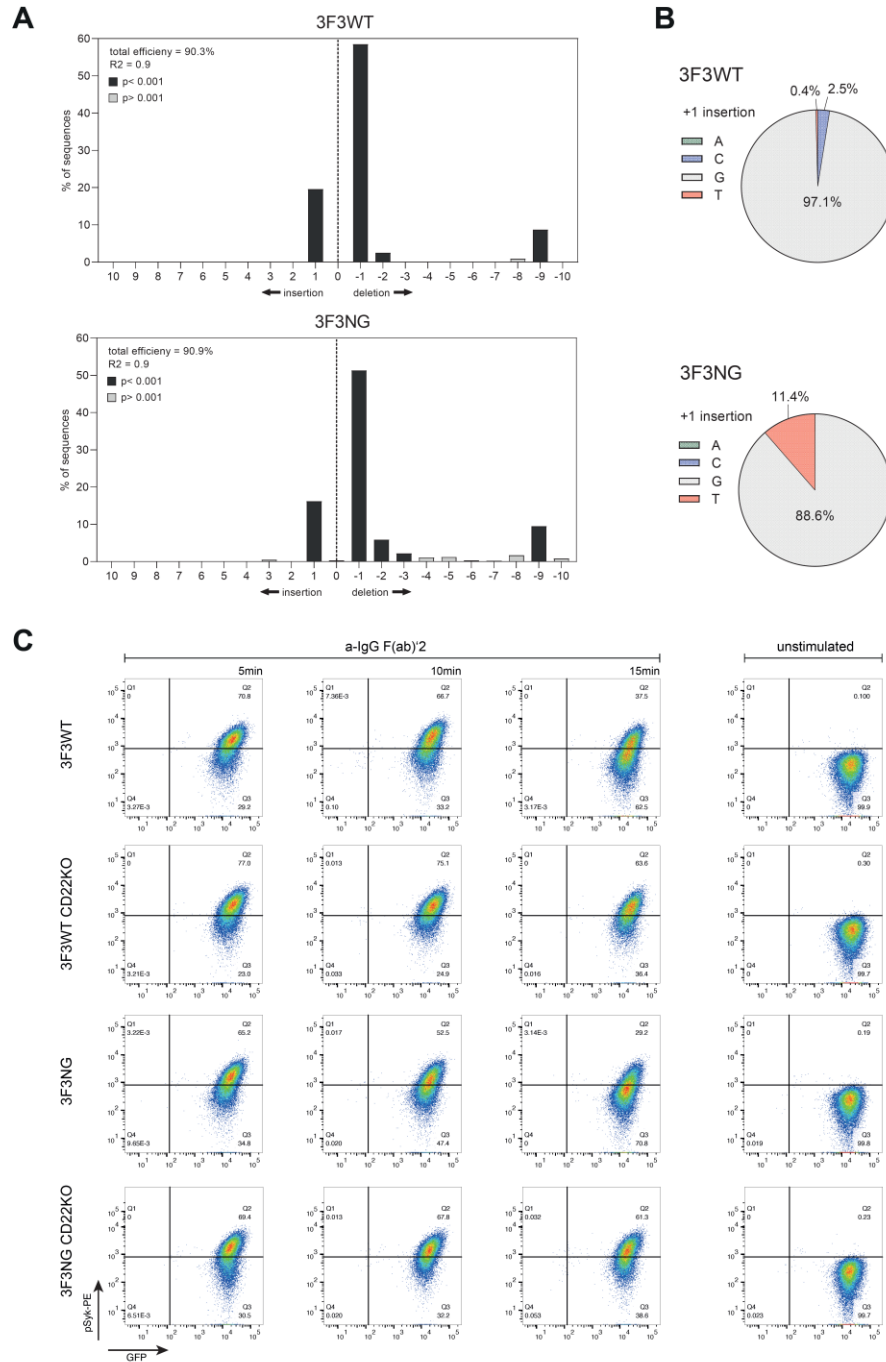

**Fig. S8. TIDE analysis 3F3 CD22KO Ramos B cells.** (A) Comprehensive profile of all insertions and deletions (indels) in the CD22 KO edited sample according to the TIDE analysis. The total KO efficiency is depicted. (B) An estimate of the +1 insertion base composition according to the TIDE analysis. (C) pSyk(Y348) expression of mIgG 3F3 WT, WT CD22KO, NG and NG CD22KO BCRs after 5, 10 and 15 minutes of a-IgG F(ab)'2 stimulation. Gating is based on the unstimulated cells. The pSyk expression is depicted on the y-axis and the GFP expression on the x-axis. One experiment is exemplarily shown.

**Table S1.** SPR Kd1 and Kd2 values of monoclonal ACPA-IgG with VDG (WT) and w/o VDG (NG) calculated based on biphasic curve fits.

| <b>Kd1</b> | <b>CCP2</b> | <b>cit-fibrinogen <math>\alpha</math> 27-43</b> | <b>cit-fibrinogen <math>\beta</math> 36-52</b> | <b>cit-vimentin 59-74</b> | <b>cit-enolase 5-20</b> | <b>Kd1</b>  | <b>CCP2</b> |
|------------|-------------|-------------------------------------------------|------------------------------------------------|---------------------------|-------------------------|-------------|-------------|
| 7E4 WT     | 8.80E-05    | nd*                                             | 7.14E-05                                       | 1.78E-05                  | 3.72E-05                | 2D11 WT     | 1.21E-04    |
| 7E4 WT+neu | 2.89E-04    | 6.10E-04                                        | 1.19E-04                                       | 2.90E-05                  | 5.18E-05                | 2D11 WT+neu | 7.82E-05    |
| 7E4 NG     | 9.36E-05    | 7.33E-05                                        | nd*                                            | 4.83E-04                  | 3.99E-03                | 2D11 NG     | 5.94E-05    |
| 7E4 NG+neu | nd*         | 7.93E-04                                        | nd*                                            | 3.96E-05                  | nd*                     | 2D11 NG+neu | 7.53E-05    |
| <b>Kd2</b> | <b>CCP2</b> | <b>cit-fibrinogen <math>\alpha</math> 27-43</b> | <b>cit-fibrinogen <math>\beta</math> 36-52</b> | <b>cit-vimentin 59-74</b> | <b>cit-enolase 5-20</b> | <b>Kd2</b>  | <b>CCP2</b> |
| 7E4 WT     | 3.74E-05    | 2.22E-04                                        | nd*                                            | 1.41E-04                  | 3.20E-04                | 2D11 WT     | nd*         |
| 7E4 WT+neu | nd*         | 1.39E-04                                        | nd*                                            | nd*                       | 4.60E-03                | 2D11 WT+neu | 5.75E-05    |
| 7E4 NG     | 1.94E-04    | 4.36E-05                                        | nd*                                            | nd*                       | nd*                     | 2D11 NG     | 7.96E-05    |
| 7E4 NG+neu | 5.39E-05    | 6.06E-05                                        | nd*                                            | nd*                       | nd*                     | 2D11 NG+neu | nd*         |

\*nd= not-determined, negative Kon values.

**Table S2.** Equilibrium  $K_D$  values of monoclonal ACPA-IgG with VDG (WT) and without VDG (NG). Equilibrium  $K_D$  and  $B_{max}$  values were calculated based on ELISA curves and shown including their standard errors.

| peptide                   | 7E4 WT                 |              | 7E4 WT + neu           |              | 7E4 NG                 |              | 7E4 NG + neu           |              |
|---------------------------|------------------------|--------------|------------------------|--------------|------------------------|--------------|------------------------|--------------|
|                           | $K_D$ [M]              | $B_{max}$    |
| CCP2                      | 1.04E-08 ±<br>6.56E-10 | 2.54 ± 0.048 | 6.78E-09 ±<br>5.02E-10 | 2.81 ± 0.051 | 2.66E-09 ±<br>4.77E-10 | 3.25 ± 0.082 | 2.88E-09 ±<br>2.29E-10 | 3.16 ± 0.037 |
| Cit-fibrinogen<br>α 27-43 | 6.64E-09 ±<br>5.67E-10 | 3.20 ± 0.066 | 5.26E-09 ±<br>6.84E-10 | 3.48 ± 0.097 | 2.83E-09 ±<br>3.47E-10 | 3.43 ± 0.062 | 2.32E-09 ±<br>3.47E-10 | 3.29 ± 0.063 |
| CCP1                      | NM*                    | NM*          | NM*                    | NM*          | 7.16E-08 ±<br>6.38E-09 | 4.83 ± 0.280 | 5.82E-08 ±<br>6.91E-09 | 4.11 ± 0.298 |
| Cit-vimentin<br>59-74     | NM*                    | NM*          | NM*                    | NM*          | 4.91E-08 ±<br>9.56E-09 | 4.44 ± 0.497 | 4.76E-08 ±<br>1.03E-08 | 4.51 ± 0.553 |
| Cit-enolase 5-<br>20      | NM*                    | NM*          | NM*                    | NM*          | 1.73E-07 ±<br>2.10E-08 | 5.39 ± 0.453 | 1.81E-07 ±<br>1.92E-08 | 5.54 ± 0.413 |
| Cit-fibrinogen<br>β 36-52 | 1.30E-08 ±<br>3.67E-10 | 2.11 ± 0.022 | 9.24E-09 ±<br>3.54E-10 | 2.31 ± 0.029 | 5.53E-09 ±<br>6.03E-11 | 2.70 ± 0.009 | 5.12E-09 ±<br>1.81E-10 | 2.61 ± 0.028 |

\*NM= not-measurable, ELISA curves not at saturation.

**Table S3.** Data collection and refinement statistics. Statistics for the highest-resolution shell are shown in parentheses.

|                                | <b>3F3:cit-vimentin 59-74</b> | <b>1F2:cit-CII-C-39</b>        | <b>1F2</b>                     | <b>7E4:cit-CII-C-48</b>        |
|--------------------------------|-------------------------------|--------------------------------|--------------------------------|--------------------------------|
| Wavelength [Å]                 | 0.91840                       | 0.97622                        | 0.97622                        | 0.91840                        |
| Resolution range [Å]           | 52.28 - 2.0 (2.071 - 2.0)     | 36.19 - 2.85<br>(2.952 - 2.85) | 35.01 - 3.05<br>(3.159 - 3.05) | 59.78 - 2.45<br>(2.538 - 2.45) |
| Space group                    | P 21 21 21                    | P 21 21 21                     | C 1 2 1                        | C 2 2 21                       |
| Unit cell a, b, c [Å]          | 53.379, 82.094, 135.613       | 53.01, 89.65,<br>118.68        | 152.43, 88.8,<br>88.02         | 77.183, 151.774,<br>97.066     |
| Unit cell a, b, c [Å]          | 90, 90, 90                    | 90, 90, 90                     | 90, 113.26, 90                 | 90, 90, 90                     |
| Total reflections              | 325932 (33061)                | 121917 (11635)                 | 95969 (9446)                   | 195694 (19513)                 |
| Unique reflections             | 40868 (4035)                  | 13784 (1351)                   | 20678 (2032)                   | 21351 (2104)                   |
| Multiplicity                   | 8.0 (8.2)                     | 8.8 (8.5)                      | 4.6 (4.6)                      | 9.2 (9.3)                      |
| Completeness [%]               | 99.37 (99.51)                 | 98.10 (98.69)                  | 99.63 (99.61)                  | 99.96 (99.86)                  |
| Mean I/sigma [I]               | 9.93 (2.16)                   | 9.97 (3.66)                    | 9.92 (3.31)                    | 22.47 (4.80)                   |
| Wilson B-factor                | 32.61                         | 44.66                          | 77.47                          | 57.62                          |
| R-merge                        | 0.1256 (0.886)                | 0.1524 (0.5557)                | 0.09467 (0.3793)               | 0.05246 (0.4131)               |
| R-meas                         | 0.1344 (0.9457)               | 0.1623 (0.5933)                | 0.1073 (0.4305)                | 0.05567 (0.438)                |
| R-pim                          | 0.04728 (0.3275)              | 0.05479 (0.2044)               | 0.04964 (0.2002)               | 0.01827 (0.1431)               |
| CC1/2                          | 0.996 (0.682)                 | 0.992 (0.901)                  | 0.993 (0.938)                  | 0.999 (0.951)                  |
| CC*                            | 0.999 (0.901)                 | 0.998 (0.974)                  | 0.998 (0.984)                  | 1 (0.987)                      |
| Reflections used in refinement | 40845 (4025)                  | 13532 (1351)                   | 20638 (2032)                   | 21348 (2104)                   |
| Reflections used for R-free    | 2023 (193)                    | 638 (74)                       | 1054 (102)                     | 1129 (106)                     |
| R-work                         | 0.2011                        | 0.2117                         | 0.2349                         | 0.2384                         |
| R-free                         | 0.2414                        | 0.2610                         | 0.2663                         | 0.2746                         |
| Number of non-hydrogen atoms   | 3762                          | 3372                           | 6444                           | 3363                           |
| macromolecules                 | 3395                          | 3275                           | 6392                           | 3276                           |
| ligands                        | 64                            | 64                             | 52                             | 39                             |
| solvent                        | 303                           | 33                             |                                | 48                             |
| Protein residues               | 447                           | 434                            | 848                            | 440                            |
| RMS [bonds]                    | 0.019                         | 0.013                          | 0.012                          | 0.013                          |
| RMS [angles]                   | 2.39                          | 1.77                           | 1.84                           | 1.89                           |
| Ramachandran favored [%]       | 97.00                         | 95.01                          | 96.12                          | 96.69                          |
| Ramachandran allowed [%]       | 3.00                          | 4.75                           | 3.03                           | 3.31                           |
| Ramachandran outliers [%]      | 0.00                          | 0.24                           | 0.85                           | 0.00                           |
| Number of TLS groups           | 3                             | 3                              | 4                              | 3                              |

**Table S4.** H-bond interaction details between the ACPA 7E4 HC and LC Fab fragments and the respective *N*-linked glycan. Shown are the H-bond donor and acceptor pairs (three letter code of the respective amino acids and monosaccharides) and the occupancy of the interaction in percentage. GlcNAc: *N*-acetyl-glucosamine, Neu5Ac: *N*-acetylneuraminic acid, Fuc: fucose, Gal: galactose, Man: mannose.

| 7E4 HC     |            |         | 7E4 LC     |            |         |
|------------|------------|---------|------------|------------|---------|
| donor      | acceptor   | oc. [%] | donor      | acceptor   | oc. [%] |
| Asn 29     | GlcNAc 221 | 5.85    | Asn 16     | GlcNAc 214 | 10.76   |
| GlcNAc 221 | Pro 73     | 1.15    | Fuc 226    | Gly 14     | 8.84    |
| Ser 74     | GlcNAc 222 | 0.94    | Fuc 226    | Asn 16     | 2.44    |
| GlcNAc 222 | Ser 74     | 0.84    | Fuc 226    | Gln 15     | 1.56    |
| Ser 74     | GlcNAc 222 | 0.49    | Gln 15     | Fuc 226    | 1.36    |
| Fuc 233    | Asn 29     | 0.49    | Arg 52     | Neu5Ac 220 | 1.04    |
| His 53     | Fuc 233    | 0.36    | Man 217    | Ala 60     | 0.9     |
| Fuc 233    | His 53     | 0.35    | Arg 52     | Neu5Ac 220 | 0.88    |
| Lys 75     | GlcNAc 225 | 0.35    | Neu5Ac 220 | Asn 66     | 0.73    |
| GlcNAc 222 | Ser 74     | 0.35    | Neu5Ac 220 | Ser 65     | 0.55    |
| Lys 75     | GlcNAc 232 | 0.32    | GlcNAc 214 | Asp 74     | 0.42    |
| Met 28     | GlcNAc 221 | 0.29    | Arg 52     | GlcNAc 218 | 0.37    |
| Lys 75     | GlcNAc 229 | 0.22    | Arg 54     | Man 217    | 0.35    |
| Asn 76     | GlcNAc 221 | 0.22    | Gly 77     | Fuc 226    | 0.31    |
| Asn 76     | GlcNAc 222 | 0.19    | Man 217    | Ser 63     | 0.28    |
| GlcNAc 222 | Asn 76     | 0.14    | Ser 63     | Man 217    | 0.28    |
| Gal 226    | Thr 22     | 0.14    | Arg 54     | Neu5Ac 220 | 0.26    |
| Gln 77     | Gal 226    | 0.11    | Neu5Ac 220 | Ser 63     | 0.25    |
| Thr 22     | Gal 226    | 0.1     | Neu5Ac 220 | Ser 63     | 0.21    |
| Ser 20     | Gal 226    | 0.04    | Neu5Ac 220 | Ile 58     | 0.21    |
| GlcNAc 232 | Lys 75     | 0.04    | Neu5Ac 220 | Gly 57     | 0.17    |
| GlcNAc 232 | Ser 74     | 0.04    | Arg 54     | Gal 219    | 0.16    |
| Gal 226    | Ser 74     | 0.02    | Ala 60     | GlcNAc 218 | 0.11    |
| Gal 226    | Lys 75     | 0.02    | Ser 56     | Neu5Ac 220 | 0.08    |
| Ser 74     | GlcNAc 221 | 0.01    | GlcNAc 215 | Ala 60     | 0.08    |
| Fuc 233    | His 53     | 0.01    | Ile 58     | Neu5Ac 220 | 0.06    |
| Lys 75     | Neu5Ac 231 | 0.01    | Neu5Ac 220 | Ser 56     | 0.05    |
| His 53     | GlcNAc 221 | 0.01    | Ala 60     | Man 217    | 0.05    |
| GlcNAc 221 | Ser 74     | 0.01    | Neu5Ac 220 | Ser 56     | 0.05    |
| Neu5Ac 231 | Thr 56     | 0.01    | Arg 61     | Man 217    | 0.04    |
| Gal 230    | Thr 54     | 0.01    | Gal 223    | Gln 79     | 0.04    |
| Glu 30     | GlcNAc 221 | 0.01    | Arg 54     | GlcNAc 218 | 0.04    |
| His 53     | Gal 230    | 0.01    | GlcNAc 215 | Ala 76     | 0.03    |
|            |            |         | Neu5Ac 224 | Gly 14     | 0.03    |
|            |            |         | Neu5Ac 224 | Gln 15     | 0.03    |
|            |            |         | Ser 56     | Gal 219    | 0.02    |
|            |            |         | Gal 219    | Ser 56     | 0.01    |
|            |            |         | Gln 79     | Neu5Ac 224 | 0.01    |
|            |            |         | Neu5Ac 224 | Gln 79     | 0.01    |
|            |            |         | Neu5Ac 224 | Pro 13     | 0.01    |
|            |            |         | Arg 61     | Man 217    | 0.01    |
|            |            |         | Arg 80     | Neu5Ac 224 | 0.01    |
|            |            |         | Neu5Ac 224 | Pro 13     | 0.01    |
|            |            |         | Gln 15     | Neu5Ac 224 | 0.01    |
|            |            |         | Neu5Ac 220 | Gly 57     | 0.01    |

|  |  |            |            |      |
|--|--|------------|------------|------|
|  |  | Gly 57     | Neu5Ac 220 | 0.01 |
|  |  | GlcNAc 214 | Ala 76     | 0.01 |
|  |  | Gal 223    | Pro 13     | 0.01 |

**Table S5.** H-bond interaction details between the ACPA 3F3 HC and LC Fab fragments and the respective *N*-linked glycan. Shown are the H-bond donor and acceptor pairs (three letter code of the respective amino acids and monosaccharides) and the occupancy of the interaction in percentage. GlcNAc: *N*-acetyl-glucosamine, Neu5Ac: *N*-acetylneuraminic acid, Fuc: fucose, Gal: galactose, Man: mannose.

| 3F3 HC #1 N-glycan |            |         | 3F3 HC #2 N-glycan |            |         | 3F3 LC     |            |         |
|--------------------|------------|---------|--------------------|------------|---------|------------|------------|---------|
| donor              | acceptor   | oc. [%] | donor              | acceptor   | oc. [%] | donor      | acceptor   | oc. [%] |
| Fuc 236            | Glu 81     | 13.02   | Fuc 249            | Glu 22     | 10.53   | Ser 71     | GlcNAc 219 | 15.43   |
| Lys 18             | Fuc 236    | 1.68    | Fuc 249            | Ser 74     | 4.57    | Asn 78     | GlcNAc 219 | 8.69    |
| Fuc 236            | Thr 70     | 1.21    | Gal 246            | Gly 25     | 2.00    | GlcNAc 220 | Asp 76     | 5.96    |
| Fuc 236            | Gln 64     | 0.68    | Phe 28             | GlcNAc 237 | 0.47    | GlcNAc 219 | Asp 76     | 4.23    |
| GlcNAc 224         | Glu 81     | 0.65    | GlcNAc 237         | Ser 24     | 0.41    | Lys 24     | GlcNAc 227 | 1.18    |
| Thr 70             | Fuc 236    | 0.26    | Gal 246            | Ser 24     | 0.21    | Gal 228    | Ser 26     | 0.96    |
| Neu5Ac 230         | Gly 65     | 0.24    | Neu5Ac 243         | Tyr 100    | 0.08    | Lys 24     | GlcNAc 220 | 0.54    |
| Asn 68             | GlcNAc 224 | 0.21    | Lys 53             | Man 240    | 0.03    | Lys 24     | Man 226    | 0.50    |
| Fuc 236            | Asn 68     | 0.14    | Asn 29             | GlcNAc 237 | 0.03    | Thr 20     | Fuc 231    | 0.34    |
| Neu5Ac 230         | Gln 64     | 0.12    | Lys 53             | GlcNAc 238 | 0.03    | GlcNAc 227 | Thr 75     | 0.31    |
| Gln 64             | Fuc 236    | 0.06    | Neu5Ac 247         | Gly 25     | 0.03    | Neu5Ac 229 | Asp 9      | 0.28    |
| Met 69             | GlcNAc 224 | 0.04    | Tyr 100            | Neu5Ac 243 | 0.03    | Fuc 231    | Thr 20     | 0.26    |
| Lys 53             | Neu5Ac 234 | 0.03    | Lys 53             | Neu5Ac 243 | 0.02    | Neu5Ac 229 | Asp 9      | 0.21    |
| Lys 53             | Gal 229    | 0.02    | Ile 27             | Gal 246    | 0.01    | GlcNAc 219 | Asp 76     | 0.19    |
| Neu5Ac 230         | Gly 14     | 0.02    | Tyr 100            | Neu5Ac 243 | 0.01    | Ser 28     | Gal 228    | 0.17    |
| Fuc 236            | Gly 65     | 0.02    |                    |            |         | Fuc 231    | Thr 20     | 0.14    |
| Lys 53             | Neu5Ac 230 | 0.01    |                    |            |         | Neu5Ac 225 | Ser 26     | 0.14    |
| Thr 83             | Neu5Ac 230 | 0.01    |                    |            |         | GlcNAc 227 | Ser 25     | 0.14    |
| GlcNAc 224         | Thr 83     | 0.01    |                    |            |         | Thr 75     | GlcNAc 227 | 0.13    |
| Thr 70             | Neu5Ac 234 | 0.01    |                    |            |         | GlcNAc 227 | Asp 76     | 0.08    |
|                    |            |         |                    |            |         | Neu5Ac 225 | Ser 73     | 0.06    |
|                    |            |         |                    |            |         | Arg 18     | Fuc 231    | 0.05    |
|                    |            |         |                    |            |         | Gal 228    | Tyr 7      | 0.05    |
|                    |            |         |                    |            |         | Gal 228    | Gln 27     | 0.05    |
|                    |            |         |                    |            |         | Asp 9      | Gal 228    | 0.04    |
|                    |            |         |                    |            |         | Neu5Ac 229 | Tyr 7      | 0.03    |
|                    |            |         |                    |            |         | Ser 73     | Neu5Ac 225 | 0.03    |
|                    |            |         |                    |            |         | Tyr 7      | Neu5Ac 229 | 0.02    |
|                    |            |         |                    |            |         | Neu5Ac 225 | Gln 27     | 0.02    |
|                    |            |         |                    |            |         | Tyr 7      | Gal 228    | 0.02    |
|                    |            |         |                    |            |         | Fuc 231    | Asn 22     | 0.02    |
|                    |            |         |                    |            |         | Tyr 7      | GlcNAc 227 | 0.02    |
|                    |            |         |                    |            |         | Gal 228    | Thr 75     | 0.02    |
|                    |            |         |                    |            |         | Thr 5      | Neu5Ac 229 | 0.01    |
|                    |            |         |                    |            |         | Neu5Ac 225 | Thr 75     | 0.01    |
|                    |            |         |                    |            |         | Ser 28     | Neu5Ac 225 | 0.01    |
|                    |            |         |                    |            |         | Ser 73     | Neu5Ac 225 | 0.01    |
|                    |            |         |                    |            |         | Gal 228    | Asp 9      | 0.01    |
|                    |            |         |                    |            |         | Gln 27     | Gal 228    | 0.01    |
|                    |            |         |                    |            |         | Thr 75     | Gal 228    | 0.01    |
|                    |            |         |                    |            |         | Neu5Ac 225 | Ser 71     | 0.01    |

**Table S6.** H-bond interaction details between the ACPA 1F2 HC and LC Fab fragments and the respective *N*-linked glycan. Shown are the H-bond donor and acceptor pairs (three letter code of the respective amino acids and monosaccharides) and the occupancy of the interaction in percentage. GlcNAc: *N*-acetyl-glucosamine, Neu5Ac: *N*-acetylneuraminic acid, Fuc: fucose, Gal: galactose, Man: mannose.

| 1F2 HC #1 N-glycan |            |         | 1F2 HC #2 N-glycan |            |         | 1F2 LC     |            |         |
|--------------------|------------|---------|--------------------|------------|---------|------------|------------|---------|
| donor              | acceptor   | oc. [%] | donor              | acceptor   | oc. [%] | donor      | acceptor   | oc. [%] |
| Ser 30             | GlcNAc 223 | 11.08   | GlcNAc 236         | Thr 55     | 4.27    | Gal 222    | Asp 151    | 21.55   |
| His 31             | Fuc 235    | 9.5     | Lys 54             | Neu5Ac 246 | 2.7     | Neu5Ac 223 | Gly 156    | 10.44   |
| Fuc 235            | His 31     | 2.4     | Fuc 248            | Ala 56     | 1.65    | GlcNAc 224 | Thr 160    | 10.39   |
| Lys 54             | Fuc 235    | 1.98    | Thr 55             | GlcNAc 236 | 0.93    | Neu5Ac 219 | Gln 161    | 9.88    |
| Fuc 235            | Ser 30     | 1.32    | Fuc 248            | Thr 55     | 0.86    | Lys 153    | Gal 222    | 7.29    |
| Neu5Ac 233         | Leu 102    | 1.14    | Neu5Ac 246         | Lys 54     | 0.74    | Gal 218    | Thr 157    | 5.81    |
| Ser 30             | GlcNAc 223 | 1.13    | Asn 57             | GlcNAc 236 | 0.22    | Gln 161    | GlcNAc 224 | 4.83    |
| Phe 29             | GlcNAc 223 | 0.89    | Gal 245            | Asn 57     | 0.2     | Neu5Ac 219 | Thr 183    | 3.81    |
| Thr 74             | GlcNAc 224 | 0.25    | GlcNAc 236         | Ala 56     | 0.15    | GlcNAc 213 | Thr 3      | 2.83    |
| Ile 104            | Fuc 235    | 0.13    | Fuc 248            | Asn 57     | 0.12    | Thr 157    | Neu5Ac 223 | 2.75    |
| Fuc 235            | Asn 28     | 0.09    | Lys 54             | Neu5Ac 246 | 0.1     | Gal 218    | Gln 161    | 2.48    |
| Asn 28             | GlcNAc 223 | 0.05    | Thr 55             | Fuc 248    | 0.1     | Fuc 225    | Asn 25     | 2.15    |
| GlcNAc 231         | Lys 54     | 0.04    | Thr 55             | Gal 245    | 0.07    | Neu5Ac 223 | Gly 156    | 1.85    |
| GlcNAc 224         | Thr 74     | 0.03    | Neu5Ac 246         | Thr 55     | 0.03    | Neu5Ac 223 | Thr 157    | 1.74    |
| Fuc 235            | Leu 102    | 0.02    | Gal 245            | Lys 54     | 0.02    | Asn 1      | GlcNAc 213 | 1.59    |
| Lys 54             | Gal 232    | 0.02    | Leu 58             | Fuc 248    | 0.01    | Gln 161    | Neu5Ac 219 | 1.42    |
| His 31             | GlcNAc 223 | 0.01    | Thr 55             | GlcNAc 236 | 0.01    | Gal 218    | Gln 161    | 1.34    |
| GlcNAc 224         | Ser 75     | 0.01    |                    |            |         | Gln 161    | GlcNAc 217 | 1.16    |
| Neu5Ac 233         | Gly 103    | 0.01    |                    |            |         | GlcNAc 224 | Gln 161    | 1.04    |
|                    |            |         |                    |            |         | Thr 160    | GlcNAc 224 | 1.02    |
|                    |            |         |                    |            |         | GlcNAc 217 | Gln 161    | 0.85    |
|                    |            |         |                    |            |         | Gal 222    | Gly 156    | 0.84    |
|                    |            |         |                    |            |         | Fuc 225    | Asn 25     | 0.81    |
|                    |            |         |                    |            |         | Gln 161    | GlcNAc 224 | 0.62    |
|                    |            |         |                    |            |         | Lys 153    | Neu5Ac 223 | 0.55    |
|                    |            |         |                    |            |         | Lys 133    | Neu5Ac 219 | 0.53    |
|                    |            |         |                    |            |         | Neu5Ac 223 | Asp 155    | 0.49    |
|                    |            |         |                    |            |         | Neu5Ac 219 | Gln 161    | 0.46    |
|                    |            |         |                    |            |         | Fuc 225    | Asn 1      | 0.42    |
|                    |            |         |                    |            |         | Neu5Ac 219 | Thr 183    | 0.39    |
|                    |            |         |                    |            |         | Thr 205    | Neu5Ac 223 | 0.39    |
|                    |            |         |                    |            |         | GlcNAc 217 | Gln 161    | 0.34    |
|                    |            |         |                    |            |         | Fuc 225    | Thr 3      | 0.27    |
|                    |            |         |                    |            |         | Thr 160    | GlcNAc 224 | 0.27    |
|                    |            |         |                    |            |         | Thr 157    | Gal 218    | 0.26    |
|                    |            |         |                    |            |         | Gal 218    | Thr 160    | 0.23    |
|                    |            |         |                    |            |         | Gln 161    | Gal 218    | 0.22    |
|                    |            |         |                    |            |         | GlcNAc 217 | Thr 160    | 0.22    |
|                    |            |         |                    |            |         | Thr 160    | Gal 218    | 0.2     |
|                    |            |         |                    |            |         | Thr 3      | Fuc 225    | 0.18    |
|                    |            |         |                    |            |         | GlcNAc 213 | Leu 2      | 0.17    |
|                    |            |         |                    |            |         | Fuc 225    | Asn 1      | 0.16    |
|                    |            |         |                    |            |         | Gly 162    | Neu5Ac 219 | 0.15    |
|                    |            |         |                    |            |         | GlcNAc 224 | Pro 158    | 0.15    |



|  |  |  |  |  |  |            |            |      |
|--|--|--|--|--|--|------------|------------|------|
|  |  |  |  |  |  | Neu5Ac 223 | Gly 203    | 0.15 |
|  |  |  |  |  |  | Neu5Ac 223 | Asp 155    | 0.14 |
|  |  |  |  |  |  | Gal 222    | Thr 157    | 0.13 |
|  |  |  |  |  |  | GlcNAc 221 | Asp 151    | 0.13 |
|  |  |  |  |  |  | Thr 185    | Neu5Ac 219 | 0.13 |
|  |  |  |  |  |  | Asn 25     | Fuc 225    | 0.1  |
|  |  |  |  |  |  | Gal 222    | Thr 205    | 0.08 |
|  |  |  |  |  |  | Gln 198    | Gal 222    | 0.07 |
|  |  |  |  |  |  | Neu5Ac 223 | Thr 157    | 0.05 |
|  |  |  |  |  |  | Arg 191    | Neu5Ac 219 | 0.05 |
|  |  |  |  |  |  | GlcNAc 221 | Thr 160    | 0.05 |
|  |  |  |  |  |  | Thr 160    | GlcNAc 217 | 0.04 |
|  |  |  |  |  |  | Thr 183    | Neu5Ac 219 | 0.03 |
|  |  |  |  |  |  | GlcNAc 217 | Thr 160    | 0.03 |
|  |  |  |  |  |  | Neu5Ac 223 | Glu 207    | 0.03 |
|  |  |  |  |  |  | Gln 161    | Man 216    | 0.02 |
|  |  |  |  |  |  | Gln 161    | GlcNAc 217 | 0.02 |
|  |  |  |  |  |  | Thr 205    | Neu5Ac 223 | 0.02 |
|  |  |  |  |  |  | Thr 185    | Neu5Ac 219 | 0.02 |
|  |  |  |  |  |  | Gal 222    | Glu 207    | 0.02 |
|  |  |  |  |  |  | Thr 183    | Neu5Ac 219 | 0.01 |
|  |  |  |  |  |  | Thr 160    | GlcNAc 221 | 0.01 |
|  |  |  |  |  |  | Gal 218    | Pro 158    | 0.01 |
|  |  |  |  |  |  | Gal 218    | His 192    | 0.01 |
|  |  |  |  |  |  | Neu5Ac 219 | Thr 185    | 0.01 |
|  |  |  |  |  |  | Gal 218    | Val 154    | 0.01 |
|  |  |  |  |  |  | Thr 157    | GlcNAc 224 | 0.01 |
|  |  |  |  |  |  | Fuc 225    | Gly 26     | 0.01 |
|  |  |  |  |  |  | Thr 157    | Neu5Ac 223 | 0.01 |
